# Supplementary material for: Applying Social Network Analysis to Understand the Knowledge Sharing Behaviour of Practitioners in a Clinical Online Discussion Forum
Source: J Med Internet Res. 2012 Dec 4;14(6):e170. doi: 10.2196/jmir.1982 (PMC3799555; doi:10.2196/jmir.1982)
Supplement: Supplementary file 1 [file jmir_v14i6e170_app1.pdf]

|      | 16 | 2  | 12 | 11 | 20 | 22 | 7  | 23 | 29 |  | 3  | 10 | 6  | 13 | 4  | 9  | 1  | 17 | 18 | 19 | 5  | 21 | 15 | 8  | 24 | 25 | 26 | 27 | 28 | 14 | 30 | 31 |
|------|----|----|----|----|----|----|----|----|----|--|----|----|----|----|----|----|----|----|----|----|----|----|----|----|----|----|----|----|----|----|----|----|
|      | U6 | U1 | U5 | U4 | U6 | U6 | U1 | U6 | U8 |  | U1 | U3 | U1 | U5 | U1 | U2 | U1 | U6 | U6 | U6 | U1 | U6 | U6 | U2 | U7 | U7 | U7 | U7 | U8 | U5 | U8 | U9 |
| U62  |    | 10 | 7  | 10 | 8  | 11 | 22 | 13 | 22 |  | 2  | 2  |    | 2  | 1  | 2  | 2  | 2  | 4  |    | 5  | 2  | 2  | 1  | 1  | 2  | 3  | 3  | 1  |    | 7  | 6  |
| U131 | 10 |    | 1  | 6  | 4  | 6  | 9  | 3  | 6  |  | 2  | 1  | 1  |    | 2  |    | 1  | 1  | 2  |    | 4  |    |    |    |    |    | 1  | 1  |    |    | 4  | 2  |
| U545 | 7  | 1  |    | 5  | 6  | 7  | 10 | 11 | 8  |  |    |    |    |    |    | 2  |    |    | 2  |    |    | 1  | 1  | 1  |    | 2  |    | 1  | 2  |    |    | 4  |
| U473 | 10 | 6  | 5  |    | 6  | 12 | 13 | 10 | 8  |  |    | 1  | 2  | 1  |    | 1  |    | 1  | 1  |    | 1  | 1  | 1  |    |    | 1  |    |    | 1  | 2  | 4  |    |
| U646 | 8  | 4  | 6  | 6  |    | 10 | 6  | 8  | 10 |  | 1  |    |    | 1  | 1  |    |    |    | 2  |    | 2  | 1  | 2  |    |    | 1  |    |    | 1  |    | 1  | 5  |
| U67  | 11 | 6  | 7  | 12 | 10 |    | 14 | 10 | 8  |  | 1  |    | 1  | 1  | 2  | 1  |    |    | 3  | 2  | 1  | 2  | 1  | 1  | 1  | 1  | 1  | 1  | 1  | 1  | 10 |    |
| U173 | 22 | 9  | 10 | 13 | 6  | 14 |    | 15 | 21 |  |    | 4  |    | 2  |    | 5  | 1  | 1  | 6  | 1  |    | 2  | 2  | 1  | 2  | 2  | 4  | 1  | 2  | 2  | 8  |    |
| U68  | 13 | 3  | 11 | 10 | 8  | 10 | 15 |    | 12 |  |    | 2  |    | 1  |    | 1  |    |    | 1  |    |    | 1  | 1  | 1  |    | 1  |    | 1  | 2  |    | 4  |    |
| U87  | 22 | 6  | 8  | 8  | 10 | 8  | 21 | 12 |    |  | 1  | 2  | 1  | 1  | 1  | 4  | 1  | 1  | 3  |    | 3  | 1  | 2  |    | 1  | 2  | 1  | 2  | 1  |    | 4  | 7  |
| U132 | 2  | 2  |    |    | 1  | 1  |    |    | 1  |  |    |    |    |    | 1  |    |    |    | 2  |    | 2  |    |    |    |    |    | 1  |    |    | 1  |    |    |
| U305 | 2  | 1  |    | 1  |    |    | 4  | 2  | 2  |  |    |    |    |    |    |    |    |    |    |    |    |    |    |    |    |    |    |    |    |    | 2  |    |
| U137 |    | 1  |    | 2  |    | 1  |    |    | 1  |  |    |    |    |    |    |    |    |    |    |    |    |    |    |    |    |    |    |    |    | 1  |    |    |
| U57  | 2  |    |    | 1  | 1  | 1  | 2  | 1  | 1  |  |    |    |    |    |    |    |    |    |    |    |    |    |    | 1  |    | 2  |    |    |    |    | 1  |    |
| U133 | 1  | 2  |    |    | 1  | 2  |    |    | 1  |  | 1  |    |    |    |    |    |    |    |    |    | 1  |    |    |    |    |    |    |    |    |    |    |    |
| U280 | 2  |    | 2  | 1  |    | 1  | 5  | 1  | 4  |  |    |    |    |    |    |    |    |    | 1  |    |    |    |    |    |    | 1  |    |    |    |    | 1  |    |
| U129 | 2  | 1  |    |    |    |    | 1  |    | 1  |  |    |    |    |    |    |    | 1  |    |    |    | 1  |    |    |    | 2  |    |    | 2  |    |    | 2  |    |
| U63  | 2  | 1  |    | 1  |    |    | 1  |    | 1  |  |    |    |    |    |    | 1  |    |    |    |    | 1  |    |    |    |    |    | 1  |    |    | 4  |    |    |
| U64  | 4  | 2  | 2  | 1  | 2  | 3  | 6  | 1  | 3  |  | 2  |    |    |    |    | 1  |    |    |    |    | 1  |    |    | 1  |    | 1  |    | 2  |    | 1  | 1  |    |
| U642 |    |    |    |    | 2  | 1  |    |    |    |  |    |    |    |    |    |    |    |    |    |    |    |    |    |    |    |    |    |    |    |    | 1  |    |
| U134 | 5  | 4  |    | 1  | 2  | 1  |    |    | 3  |  | 2  |    |    | 1  |    | 1  | 1  | 1  |    |    |    |    |    |    | 1  |    | 1  | 2  |    | 3  |    |    |
| U66  | 2  |    | 1  | 1  | 1  | 2  | 2  | 1  | 1  |  |    |    |    |    |    |    |    |    |    |    |    |    |    |    |    | 1  |    |    |    |    | 1  |    |
| U60  | 2  |    | 1  | 1  | 2  | 1  | 2  | 1  | 2  |  |    |    |    |    |    |    |    |    |    |    |    |    |    |    |    | 1  |    |    |    |    | 1  |    |
| U2   | 1  |    | 1  |    |    | 1  | 1  | 1  |    |  |    |    |    |    |    |    |    |    | 1  |    |    |    |    |    |    |    |    | 1  |    |    | 1  |    |
| U72  | 1  |    |    |    |    | 1  | 2  |    | 1  |  |    |    |    | 1  |    |    |    |    |    | 1  |    |    |    |    |    |    |    | 1  |    |    | 1  |    |
| U73  | 2  |    | 2  | 1  | 1  | 1  | 2  | 1  | 2  |  |    |    |    |    |    | 1  |    |    | 1  |    |    | 1  |    |    |    |    |    |    |    |    | 1  |    |
| U74  | 3  | 1  |    |    |    | 1  | 4  |    | 1  |  |    |    | 2  |    |    |    |    |    |    |    | 1  |    |    |    | 2  |    |    |    | 1  | 1  |    |    |
| U78  | 3  | 1  | 1  |    |    | 1  | 1  | 1  | 2  |  | 1  |    |    |    |    | 2  | 1  | 2  |    | 2  |    |    | 1  | 3  |    |    |    |    | 2  | 1  |    |    |
| U83  | 1  |    | 2  | 1  | 1  | 1  | 2  | 2  | 1  |  |    |    |    |    |    |    |    |    |    |    |    |    |    |    |    |    |    |    |    |    | 1  |    |
| U59  |    |    |    |    |    | 2  |    |    |    |  |    |    |    |    |    |    |    |    |    | 1  |    |    |    |    | 1  |    | 1  |    |    |    |    |    |
| U88  | 7  | 4  |    | 2  | 1  | 1  | 2  |    | 4  |  | 1  |    | 1  |    |    | 2  | 4  | 1  |    | 3  |    |    |    | 1  |    | 1  | 2  |    |    |    |    |    |
| U99  | 6  | 2  | 4  | 4  | 5  | 10 | 8  | 4  | 7  |  |    | 2  |    | 1  |    | 1  |    |    | 1  | 1  |    | 1  | 1  | 1  |    | 1  |    | 1  | 1  |    |    |    |
