# Supplementary material for: Applying Social Network Analysis to Understand the Knowledge Sharing Behaviour of Practitioners in a Clinical Online Discussion Forum
Source: J Med Internet Res. 2012 Dec 4;14(6):e170. doi: 10.2196/jmir.1982 (PMC3799555; doi:10.2196/jmir.1982)
Supplement: Supplementary file 2 [file jmir_v14i6e170_app2.pdf]

|   |   |   |   |   |   |   |   |   |   |   |   |   |   |   |   |   |   |   |   |   |   |   |   |
|---|---|---|---|---|---|---|---|---|---|---|---|---|---|---|---|---|---|---|---|---|---|---|---|
| 1 | 2 | 1 | 1 | 2 | 2 |   |   | 1 | 1 |   | 1 | 1 | 1 | 2 | 2 | 1 | 2 | 2 | 2 | 2 | 1 | 3 | 3 |
| 6 | 2 | 2 | 1 | 2 | 7 | 3 | 9 | 3 | 6 | 0 | 9 | 3 | 4 | 5 | 1 | 7 | 8 | 9 | 0 | 1 | 5 | 8 | 4 |
| U | U | U | U | U | U | U | U | U | U | U | U | U | U | U | U | U | U | U | U | U | U | U |   |

|      |   |   |   |   |   |   |   |   |   |   |   |   |   |   |   |   |   |   |   |   |   |   |
|------|---|---|---|---|---|---|---|---|---|---|---|---|---|---|---|---|---|---|---|---|---|---|
| T100 | 1 | 1 | 1 | 1 | 1 |   |   |   |   |   |   | 1 |   |   |   | 1 |   |   | 1 |   |   | 1 |
| T101 | 1 |   |   |   | 1 |   |   |   |   |   |   |   |   |   |   |   |   | 1 |   |   |   |   |
| T102 |   |   |   | 1 | 1 |   |   | 1 |   |   |   |   |   |   |   |   |   |   |   |   |   |   |
| T103 |   |   |   | 1 | 1 |   |   |   |   |   |   |   |   |   |   |   |   |   |   |   |   |   |
| T32  |   |   |   |   |   |   |   |   |   |   |   | 1 |   |   |   |   |   | 1 |   | 1 |   |   |
| T105 | 1 | 1 |   | 1 | 1 | 1 | 1 |   |   |   |   |   |   |   |   |   |   |   |   |   |   |   |
| T34  | 1 | 1 |   |   |   |   |   |   |   |   |   | 1 |   |   | 1 |   |   |   |   |   |   |   |
| T135 |   |   | 1 |   | 1 |   |   |   |   |   |   |   |   |   |   |   |   |   |   |   |   |   |
| T108 | 1 |   |   | 1 | 1 |   | 1 |   | 1 |   |   |   | 1 |   |   |   |   | 1 |   |   |   |   |
| T137 | 1 |   | 1 | 1 |   | 1 | 1 |   |   |   |   |   | 1 |   |   |   |   |   |   |   |   |   |
| T110 |   |   |   | 1 | 1 |   | 1 |   | 1 |   |   |   |   |   |   |   |   |   |   |   |   | 1 |
| T39  | 1 | 1 |   | 1 |   | 1 |   | 1 |   |   |   |   |   |   |   |   |   |   |   |   |   |   |
| T112 |   |   | 1 | 1 | 1 |   | 1 |   |   |   |   |   |   |   |   |   |   |   |   |   |   |   |
| T113 |   |   | 1 |   |   |   |   |   |   |   |   |   |   |   | 1 |   |   |   |   |   |   |   |
| T114 |   |   | 1 |   |   | 1 |   |   |   |   |   |   |   | 1 |   |   |   |   |   |   |   |   |
| T43  |   |   |   |   |   |   |   |   |   |   |   | 1 |   |   |   |   |   |   | 1 |   |   |   |
| T72  |   |   |   |   |   |   |   |   |   |   |   |   |   |   |   |   |   | 1 |   |   |   |   |
| T145 |   |   |   |   |   |   | 1 |   |   |   |   |   |   |   |   |   |   |   |   |   |   | 1 |
| T46  | 1 | 1 |   |   |   |   | 1 |   |   |   |   | 1 | 1 |   |   |   |   |   | 1 |   | 1 |   |
| T147 | 1 |   |   |   | 1 |   | 1 |   |   |   |   |   |   | 1 |   | 1 |   |   |   |   |   | 1 |
| T120 |   | 1 | 1 | 1 |   | 1 |   |   |   |   |   |   | 1 |   | 1 |   |   |   |   |   |   |   |
| T121 | 1 | 1 | 1 |   |   | 1 | 1 | 1 |   |   |   |   |   |   |   |   |   |   |   |   |   |   |
| T150 |   |   |   |   | 1 | 1 | 1 |   |   |   |   |   |   |   |   |   |   |   |   |   |   |   |
| T123 | 1 |   | 1 |   |   |   | 1 |   |   |   |   |   |   |   |   |   |   |   |   |   |   | 1 |
| T124 |   | 1 |   |   |   |   |   |   |   |   |   |   |   |   |   |   |   |   |   |   |   |   |
| T24  | 1 |   |   |   |   |   | 1 |   |   |   | 1 | 1 |   |   |   |   | 1 |   | 1 |   | 1 |   |
| T94  | 1 |   |   |   | 1 |   | 1 |   | 1 |   |   |   |   |   |   |   |   |   |   |   |   |   |
| T127 | 1 |   |   |   | 1 |   | 1 |   |   |   |   | 1 |   |   |   |   |   |   |   |   |   |   |
| T98  |   |   | 1 |   |   | 1 | 1 |   |   |   |   |   |   |   |   |   |   |   |   |   |   |   |
| T57  | 1 |   | 1 |   |   |   |   |   |   |   |   |   |   |   |   |   |   |   |   |   |   | 1 |
| T130 | 1 |   | 1 |   | 1 | 1 | 1 |   |   |   |   |   |   |   |   |   |   |   |   |   |   |   |
| T131 | 1 |   | 1 | 1 | 1 | 1 | 1 | 1 |   |   |   |   | 1 | 1 |   |   | 1 |   |   |   |   | 1 |
| T60  |   |   |   |   |   |   |   |   |   |   |   |   |   |   |   |   | 1 |   |   |   |   |   |
| T140 |   |   |   |   | 1 |   | 1 | 1 |   |   |   |   |   | 1 |   |   |   |   |   |   |   |   |
| T134 |   |   | 1 | 1 | 1 | 1 | 1 | 1 |   |   |   |   |   | 1 |   |   |   |   | 1 |   | 1 |   |
| T62  |   | 1 |   |   |   | 1 |   |   |   |   |   |   |   |   |   |   |   |   |   |   |   | 1 |
| T136 | 1 |   | 1 | 1 |   |   | 1 | 1 |   |   |   | 1 |   |   |   |   |   |   |   |   |   | 1 |
| T36  |   |   | 1 |   |   |   | 1 |   |   |   | 1 |   |   |   |   |   |   |   |   |   |   |   |
| T65  |   |   |   |   | 1 |   |   |   |   |   |   |   |   |   |   |   |   |   |   |   |   |   |
| T139 | 1 |   |   |   | 1 | 1 | 1 | 1 |   |   |   |   |   |   |   |   |   |   | 1 |   |   |   |
| T28  | 1 | 1 |   |   |   |   |   |   |   |   |   | 1 |   |   |   |   |   |   |   |   |   |   |
| T26  |   |   |   |   |   |   |   |   |   |   |   | 1 | 1 |   |   |   |   |   |   |   |   | 1 |
| T142 | 1 |   | 1 | 1 | 1 | 1 | 1 | 1 |   |   |   |   |   | 1 |   | 1 |   |   |   |   |   |   |
| T93  |   |   | 1 | 1 |   | 1 |   |   |   |   | 1 |   |   |   |   |   |   |   |   |   |   |   |
| T29  | 1 |   |   |   |   |   |   |   |   |   |   |   |   |   |   |   |   | 1 |   |   | 1 |   |
| T30  |   |   |   |   |   |   |   | 1 |   |   |   |   | 1 |   |   |   |   |   | 1 |   |   |   |
| T149 |   |   |   |   | 1 |   | 1 |   |   |   |   |   |   |   |   |   |   |   |   |   |   |   |
| T48  | 1 | 1 | 1 |   |   |   | 1 |   | 1 |   |   | 1 |   | 1 |   |   |   |   |   |   | 1 |   |
| T148 | 1 |   |   |   |   |   | 1 |   |   |   |   |   |   |   |   |   |   |   |   |   |   |   |
| T23  |   |   |   |   | 1 |   |   |   |   |   | 1 |   |   |   |   |   |   | 1 |   | 1 |   |   |
| T58  |   | 1 |   |   | 1 |   |   |   |   |   |   |   |   |   |   |   |   |   |   |   |   |   |
| T81  | 1 |   |   | 1 |   | 1 | 1 | 1 |   | 1 |   |   |   |   |   |   |   |   |   |   |   |   |
| T99  |   |   | 1 |   |   | 1 |   |   |   |   |   |   |   |   |   |   |   |   |   |   |   |   |
| T79  |   |   |   |   | 1 |   | 1 |   |   |   |   |   |   |   |   |   |   |   |   |   |   |   |
| T119 |   |   |   |   | 1 |   |   |   |   |   |   |   |   |   |   |   |   |   |   |   |   |   |
| T133 |   |   |   |   |   |   |   |   |   |   |   |   | 1 |   |   |   |   |   |   |   |   |   |
| T122 |   | 1 | 1 |   |   | 1 |   |   |   |   |   |   |   | 1 |   |   |   |   |   |   |   | 1 |
| T126 |   |   |   |   | 1 |   |   |   |   |   |   |   |   |   |   |   |   |   |   |   |   |   |
| T141 |   |   |   |   | 1 |   | 1 | 1 |   |   |   |   |   |   | 1 |   |   |   |   |   |   |   |
| T146 |   |   |   |   | 1 |   | 1 |   |   |   |   |   |   |   |   |   |   |   |   |   |   |   |
| T143 | 1 |   |   | 1 |   | 1 | 1 | 1 |   |   |   |   |   | 1 |   |   |   |   |   |   |   |   |
| T104 |   |   |   |   |   | 1 |   |   |   |   |   |   |   |   |   |   |   |   |   |   |   |   |
| T33  |   |   | 1 |   |   |   |   |   |   |   |   |   |   |   |   |   |   |   | 1 |   |   |   |
| T31  |   |   |   |   |   |   |   |   |   |   |   |   |   |   |   |   |   |   |   | 1 |   |   |
| T35  |   |   | 1 |   |   |   |   | 1 |   |   |   |   |   |   |   |   |   |   | 1 |   |   |   |
| T109 |   |   | 1 | 1 |   |   |   |   |   |   |   |   |   |   |   |   |   |   |   |   |   |   |
| T138 |   |   |   |   | 1 |   |   |   |   |   |   |   |   |   |   |   |   |   |   |   |   |   |
| T38  |   | 1 | 1 |   |   |   |   |   |   |   | 1 |   |   |   |   |   |   |   |   |   |   |   |
| T111 |   |   | 1 |   |   |   |   |   |   |   |   |   |   | 1 |   |   |   |   |   |   |   | 1 |

[illegible]
